# Supplementary material for: Increased Expression of TLR10 in B Cell Subsets Correlates with Disease Activity in Rheumatoid Arthritis
Source: Hindawi journal article supplement (doi:10.1155/2018/9372436), 2018-12-27
Supplement: f1 [file 9372436.f1.pdf]

Table 1. Serum concentration of cytokines in all participants

| Group             | N  | IL-IR $\alpha$ (pg/ml) | IL-I $\beta$ (pg/ml) | IL-10(pg/ml)       |
|-------------------|----|------------------------|----------------------|--------------------|
| Healthy control   | 30 | 678.91 $\pm$ 131.18    | 12.85 $\pm$ 1.80     | 1.18 $\pm$ 0.16    |
| All RA group      | 77 | 582.27 $\pm$ 86.98     | 16.00 $\pm$ 2.00     | 9.63 $\pm$ 3.66*   |
| Low activity      | 19 | 414.67 $\pm$ 210.63    | 12.41 $\pm$ 3.63     | 2.08 $\pm$ 0.71    |
| Moderate activity | 29 | 582.18 $\pm$ 126.04    | 15.24 $\pm$ 2.14     | 8.56 $\pm$ 3.40*   |
| High activity     | 29 | 693.36 $\pm$ 137.30    | 19.10 $\pm$ 4.16     | 15.65 $\pm$ 9.07** |

Values described are the mean  $\pm$  SE

\* P< 0.05, \*\* P<0.01 versus healthy controls

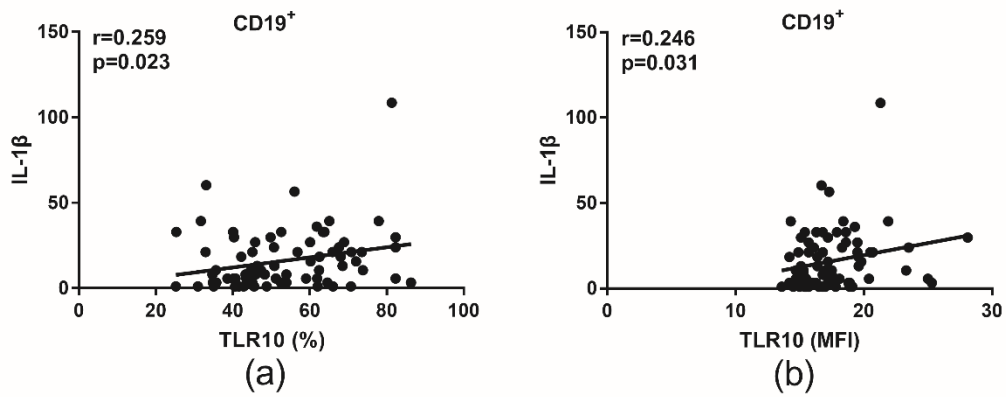

Figure 1: The correlation between %TLR10<sup>+</sup> (a), TLR10 MFI (b) in CD19<sup>+</sup> B cells and IL-1 $\beta$  concentrations.

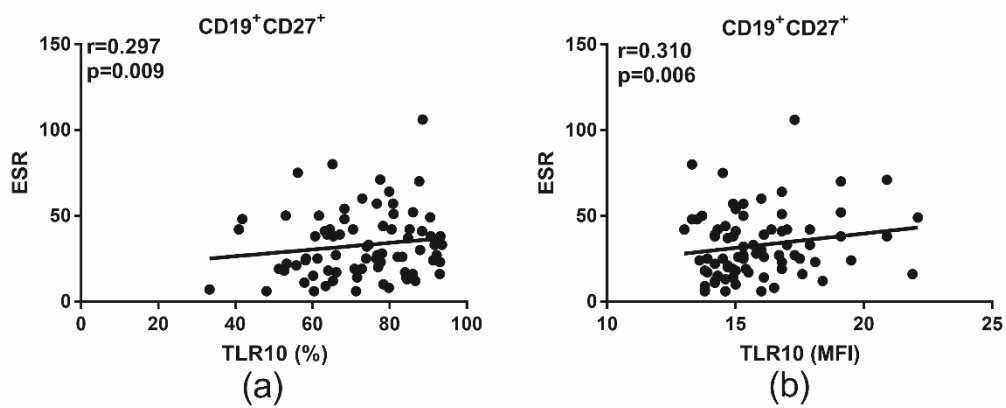

Figure 2: The correlation between %TLR10<sup>+</sup> (a), TLR10 MFI (b) in CD19<sup>+</sup>CD27<sup>+</sup> B cells and ESR.

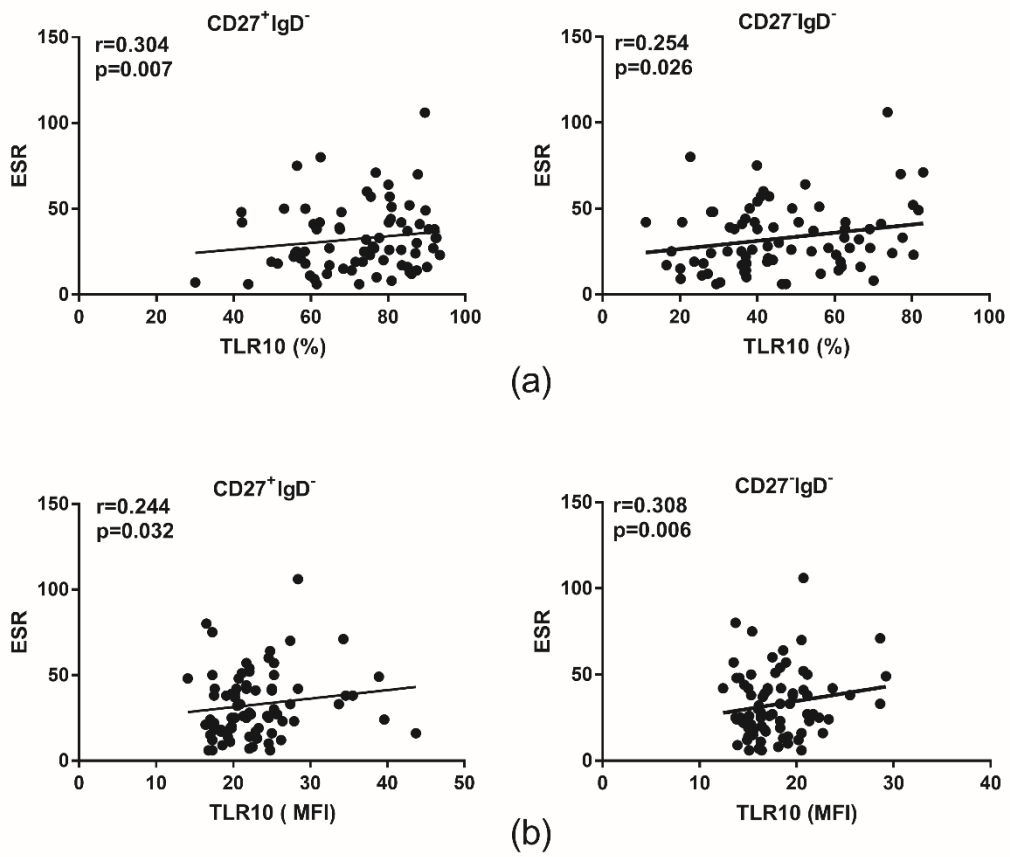

Figure 3: (a) The correlation between % TLR10<sup>+</sup> in CD27<sup>+</sup> IgD<sup>-</sup> B cells and ESR. (b) The correlation between TLR10 MFI in CD27<sup>+</sup> IgD<sup>-</sup> B cells and ESR.
